# Supplementary material for: Insight into the Lytic Functions of the Lactococcal Prophage TP712
Source: MDPI journal article supplement (doi:10.3390/v11100881), 2019-09-20
Supplement: s1 [file s1]

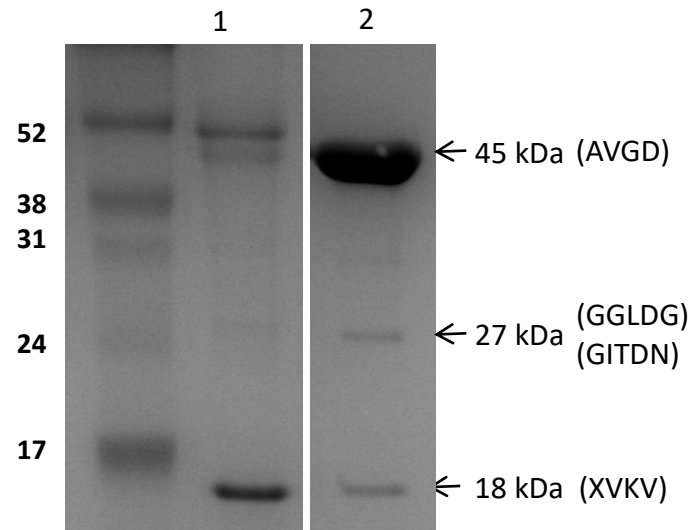

**Supplementary Figure 1.** SDS-PAGE of recombinant LysTP712 produced by *L. lactis* NZ9000/pLysTP712 (Lane 1) and *E. coli* BL21 (pLys)/pETLysTP712 (Lane 2) eluted at pH 4.5 (Fraction II). Total protein loaded in the gel was 1.8  $\mu$ g and 5.4  $\mu$ g, respectively.
