# Supplementary material for: Insight into the Lytic Functions of the Lactococcal Prophage TP712
Source: MDPI journal article supplement (doi:10.3390/v11100881), 2019-09-20
Supplement: s1 [file s1]

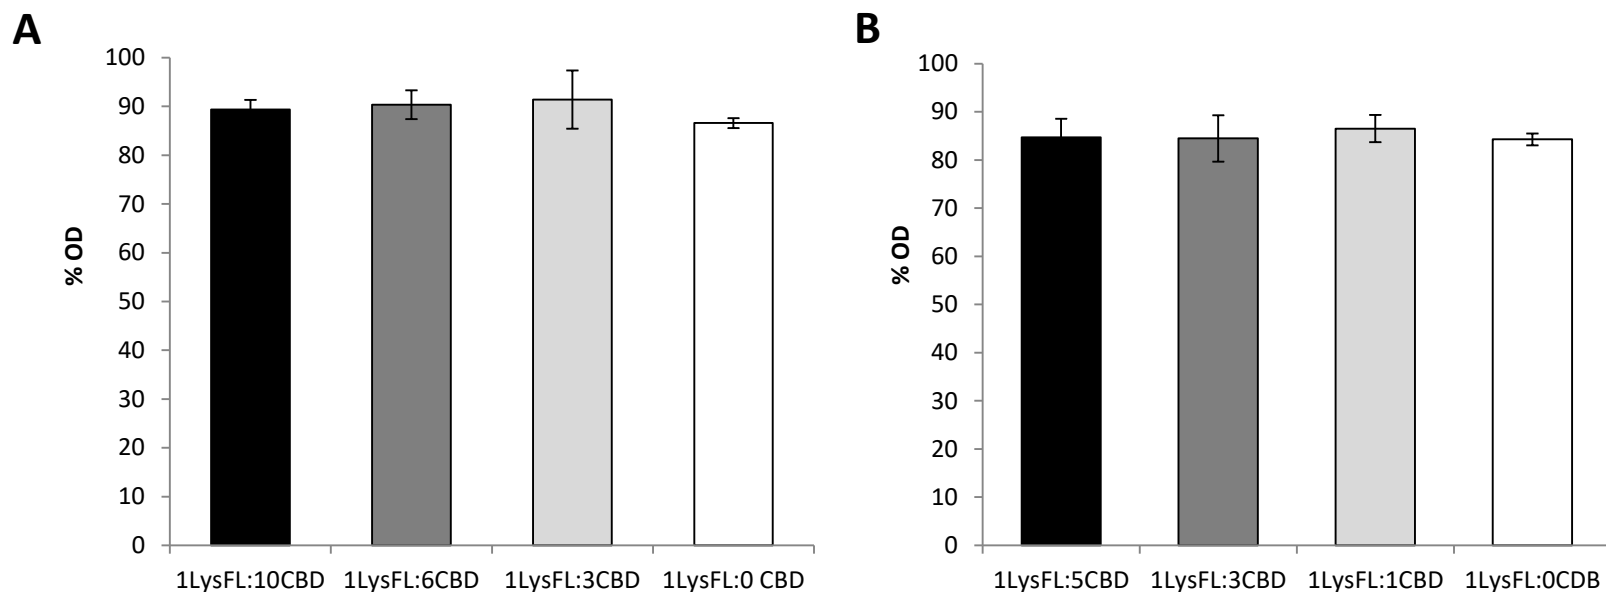

**Supplementary Figure 2.** Inhibitory activity of LysTP712 against *L. lactis* in the presence of additional cell binding domains (CBD). (A) Mid log cultures of *L. lactis* MG1363 were preincubated with LysTP712CDB and treated with LysTP712 (0.05  $\mu$ M) to get molar ratios LysTP712:CBD of 1:10, 1:6, 1:3 or without CBDs (black, dark grey, light grey and white bars, respectively). (B) LysTP712FL at 0.05  $\mu$ M was co-incubated first with LysTP712CDB at 1:1, 1:3 and 1:5 molar ratios or without CBDs before addition to mid log cultures of *L. lactis* MG1363 (black, dark grey, light grey and white bars, respectively). Columns represent growth of treated cultures relative to untreated cultures (taken as 100%) after 120 min. Means and standard deviations of three independent experiments are represented.
